# Supplementary material for: A candidate gene study of the type I interferon pathway implicates IKBKE and IL8 as risk loci for SLE
Source: PubMed Central journal article supplement — Eur J Hum Genet. 2010 Dec 22;19(4):479–84. doi: 10.1038/ejhg.2010.197 (PMC3060320; doi:10.1038/ejhg.2010.197), 2010-12-22
Supplement: ejhg2010197x1.pdf [file ejhg2010197x1.pdf]

# A candidate gene study of the type I interferon pathway implicates *IKBKE* and *IL8* as risk loci for SLE

Johanna K. Sandling, Sophie Garnier, Snaevar Sigurdsson, Chuan Wang, Gunnel Nordmark, Iva Gunnarsson, Elisabet Svenungsson, Leonid Padyukov, Gunnar Sturfelt, Andreas Jönsen, Anders A. Bengtsson, Lennart Truedsson, Catharina Eriksson, Solbritt Rantapää-Dahlqvist, Anders Mälarstig, Rona J. Strawbridge, Anders Hamsten, Lindsey A. Criswell, Robert R. Graham, Timothy W. Behrens, Maija-Leena Eloranta, Gunnar Alm, Lars Rönnblom and Ann-Christine Syvänen

## Supplementary information

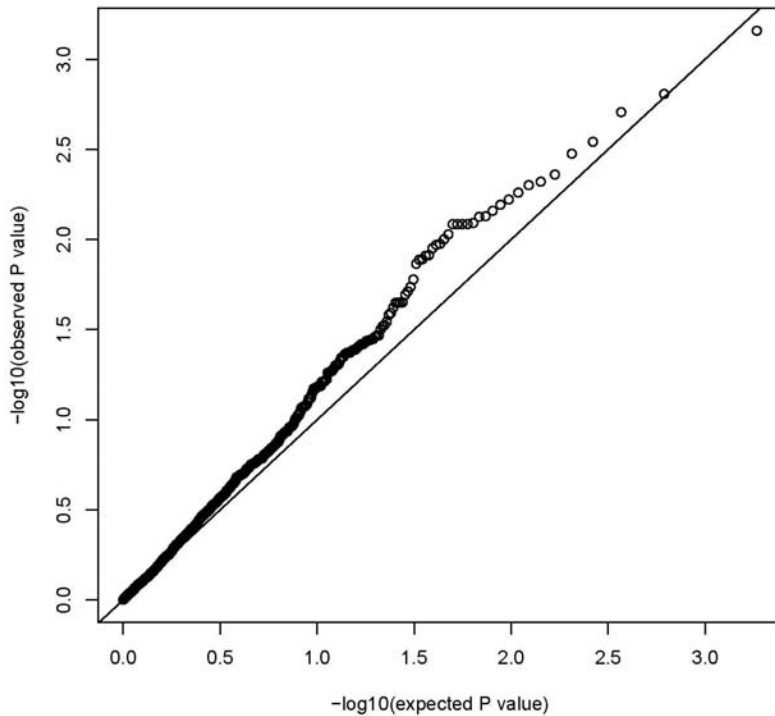

**Figure S1** Q-Q plot of association results in the discovery phase. The observed P-values are plotted against the theoretical distribution, the deviation from the null distribution suggests the presence of multiple weak associations in the data. Only nine associated SNPs would be expected by chance with P values < 0.01, and after removal of the SNPs in the 14 genes included based on prior evidence for association to SLE, we observed 20 ( $P = 0.030$ , Fisher's exact test), which indicates the presence of true associations in our data.

**Table S1** Number of SLE patients and controls analysed

|                                | <i>Discovery</i> |      | <i>Confirmation</i> |      | <i>Replication</i> |       | <i>Total</i> |        |
|--------------------------------|------------------|------|---------------------|------|--------------------|-------|--------------|--------|
|                                | SLE              | Ctrl | SLE                 | Ctrl | SLE                | Ctrl  | SLE          | Ctrl   |
| <i>Sweden</i>                  |                  |      |                     |      |                    |       |              |        |
| Uppsala                        | 131              | 161  | 19                  | 291  | -                  | -     | 150          | 452    |
| Stockholm                      | 203              | 187  | 114                 | 161  | -                  | -     | 317          | 348    |
| Lund                           | 156              | 195  | -                   | -    | -                  | -     | 156          | 195    |
| Umeå                           | -                | -    | 260                 | 520  | -                  | -     | 260          | 520    |
| (Broadbent <i>et al.</i> 2008) | -                | -    | -                   | 673  | -                  | -     | 0            | 673    |
| <i>US</i>                      |                  |      |                     |      |                    |       |              |        |
| (Hom <i>et al.</i> 2008)       | -                | -    | -                   | -    | 1 435              | 3 583 | 1 435        | 3 583  |
| (Gateva <i>et al.</i> 2009)    | -                | -    | -                   | -    | -                  | 4 564 | 0            | 4 564  |
| <i>Sum</i>                     |                  |      |                     |      |                    |       |              |        |
| Pre-QC                         |                  |      |                     |      |                    |       | 2 318        | 10 335 |
| Post-QC                        |                  |      |                     |      |                    |       | 2 136        | 9 694  |

**Table S2** Sequences of primers used in the confirmatory phase. Sequences are given in the 5' to 3' direction. SNPs were genotyped in either 12 or 48-plex assays using the SNPstream system.

**A** PCR primers

| <i>SNP</i> | <i>PCR forward primer</i>    | <i>PCR reverse primer</i>          |
|------------|------------------------------|------------------------------------|
| rs1539243  | ARGTGAGGGAGTTTGAGGTC         | CAAGCACCGGACCTACCG                 |
| rs17433930 | TACTGGCATCCTCAGAGCT          | TTCTTCCAGGAGCTCAGACT               |
| rs3754974  | TAGTTCCTCCTTATCTTAGTCTAATAGC | GAAAATTATTTACCAGAAGCAGAAGT         |
| rs13397244 | GAAGTCAACCAGATTCATTAATAGT    | ATTTATTGAGACTTCTGAATATAAACCTAAG    |
| rs12476789 | ATGTCTTTGAGATCTATCTTGTCTCTC  | CATCTCCCACTAAGTAGCAATGA            |
| rs7600342  | TTTCAATCCTTCAGGTAAGTATAAT    | AATCCTGTGTTTCGGTCCT                |
| rs3754972  | AATAAACCAAGTTCTACTGGTTATTTTC | AAAAAAGTACAAAGATTTTGACCAC          |
| rs1267075  | AATCCTTGACTGAAATGTCTTTAAATA  | GGCTCCAGGAATGACTTGATA              |
| rs3769972  | ATAATTTCTAGACAAGAGCCAGAATTAT | TAAATGAAATGGCTCATTCAA              |
| rs10178063 | TCCAATCTCCATTCAATCCTT        | AGAGAGTGAAGGAAAGGAGCC              |
| rs16833155 | TGAAGGGCTTTAGGGTTGTAT        | ATATTCAGCCATTTATTTTTGTTCTG         |
| rs2030171  | AGCAAAGAAAAGTCTTCTGCTC       | TTTTCTAATCTGTGGGATGGG              |
| rs10199181 | ATTTAACCTAAAAATTCCTTCTGT     | TTATTGGTATTTAGAGAAGTAATAGAGACTAACT |
| rs16833172 | TTTTTCAGTTCAGTTTTATTTTACCTG  | TGGGTTCGCTTGGCTAAT                 |
| rs17817900 | ATCCTCAAATCTTAATTGATTCTTCC   | AATGGATTTAAAGGTAGATAAGGGC          |
| rs4694178  | AATTTAGTTTAGTGATGGTCTGGTG    | ATATGCCAGCAAAAATACCTCTC            |
| rs734187   | AATATTCTGGGCATTGACTTAGC      | TTTTCAAATTGACTTGCTTTCC             |
| rs2269103  | TAAATCACTATCGGGTTCTG         | TTGCATATGTAGTAATGGTATTTTCATT       |
| rs1331314  | ACACACTACATTCTGATAACAAAGA    | ATAAGAGTTTCAAATTGCATTAGATGT        |
| rs2073320  | GTGAAATAGAACATTTATAAAGGCG    | AATTACCTTTCATTTTCGTTTGT            |
| rs5030482  | AAATTAAGGCTGATCTAYAACGCT     | GAGACCCGCACTAGTATAAGCT             |
| rs5030472  | TCCACCTCAAATCATCTACATTG      | TGAAATAGTTTTCCAAGAAGACAAA          |
| rs2303439  | TTTAAACTGTATTGTCAATGGCTG     | TTTCCTTCTCTATAACTTTTGAAAGTAG       |
| rs6503691  | AAAGAAGCAACAAGGAAAAATG       | TGTTCTTCTATTGTAATATGCAGTG          |
| rs2289863  | TACTACCCCTCCAATAAGCCC        | TGACAGTGATGCGGTTGG                 |

**B** Minisequencing primers

| <i>SNP</i> | <i>Extension primer containing tag-sequence</i>  | <i>Strand</i> | <i>Alleles</i> | <i>Assay</i> |
|------------|--------------------------------------------------|---------------|----------------|--------------|
| rs1539243  | CGCAGAAGCAACTCACTTCTTGCGGAAGCTGAACCACCAGAACAT    | Forward       | C/T            | 48-plex      |
| rs17433930 | AACATCCACGCAACTCATAcAGTGGAAACAGGGAGATCTGGATTT    | Forward       | C/T            | 48-plex      |
| rs3754974  | CAGAACATCCTCAGAAGCAATCATGTATTTTCATCTCTTTTTGCAT   | Forward       | C/T            | 48-plex      |
| rs13397244 | AGCAAGACCACCTAGACCAGGCACATCAAAGATTTGACTGAGAAC    | Forward       | C/T            | 12-plex      |
| rs12476789 | CGACTGTAGGTGCGTAACTCTTAAGATGATTAGAGTATTGATAGG    | Forward       | A/G            | 12-plex      |
| rs7600342  | AGCGATCTGCGAGACCGTATTTTCATTACAGAGGAAGAAACAAA     | Forward       | A/G            | 12-plex      |
| rs3754972  | AGCGATCTGCGAGACCGTATAGTTTGATGTAATATTTCTTTTGG     | Forward       | A/T            | 12-plex      |
| rs1267075  | CAGCCATCCATTCACTATCTACTTCTGCGGTGCTTTAAGTGTCTT    | Forward       | C/T            | 48-plex      |
| rs3769972  | ATCTAACGCACCTACGACCTGGTCACTTGGGAGAGAATATTATGT    | Forward       | C/T            | 48-plex      |
| rs10178063 | GCAAGCCATCAGCTAATACAGACTTGGGCTGAATTTAAACTC       | Forward       | C/T            | 48-plex      |
| rs16833155 | GGCTATGATTCGCAATGCTTCTGTAGGTACCCAGATTTCTTGTG     | Reverse       | A/G            | 12-plex      |
| rs2030171  | GATCCATCAACAGACATCACCCCTTACTTGGACAACCTGCTCACTC   | Reverse       | C/T            | 48-plex      |
| rs10199181 | GGCTATGATTCGCAATGCTTATGCTATATTTACTGATGCTGTAGA    | Forward       | A/T            | 12-plex      |
| rs16833172 | AGTAGCCTAACAGCACTCGAAGGCGTTGCAGCTCCCATTGCCTGA    | Reverse       | C/T            | 48-plex      |
| rs17817900 | AATAAGCTCACCACCGTCAAGCAGAAGGAGGCAGCAGAAGAGATG    | Reverse       | C/T            | 48-plex      |
| rs4694178  | ACGCACGTCCACGGTGATTTTTTCTATTGGTTGTCCAAAGGAAG     | Forward       | A/C            | 12-plex      |
| rs734187   | AGACCGACAAGCAATCTACAGAGTCATGAATCTGGACTCCAAGTG    | Reverse       | C/T            | 48-plex      |
| rs2269103  | CAGCACTATTACCATCAGTACTGACAATAACTTAATTGGGCCT      | Reverse       | C/T            | 48-plex      |
| rs1331314  | GCGGTAGGTTCCCGACATATAATGGTGCTGGGGTTTCTATACACT    | Forward       | CG             | 12-plex      |
| rs2073320  | CCACTCAACTCCACGAATACACATCTGGCAGAGTACTGAGTCAC     | Reverse       | C/T            | 48-plex      |
| rs5030482  | CCATAACAACCTACCAGCCAAAGTTGTCTGGTAATGAGAGATGAC    | Reverse       | C/T            | 48-plex      |
| rs5030472  | CACTAGTCATAACGCAGCCTGATTTGAGGAACTACAAGTAGTTTGT   | Reverse       | C/T            | 48-plex      |
| rs2303439  | ACAACCTCACGCAAGTACCATTGATGGTTTATGTGCTGCACCTATTCA | Reverse       | C/T            | 48-plex      |
| rs6503691  | CAGAATAGCCACGCCTAGATTTTGGCTGTGACATAAAGATTAATG    | Reverse       | C/T            | 48-plex      |
| rs2289863  | CACCGCTATCAACAGACTTGGGCCGTGCCGCCCATCAACCTCAC     | Forward       | C/T            | 48-plex      |

**Table S3** List of IFN related genes included in the discovery phase<sup>1</sup>**A** TLRs and intracellular sensors and their signaling pathways and transcription factors, with a focus on PDC and regulation of IFN-genes

| <i>Gene</i>        | <i>Location</i> | <i>SNP with lowest P</i> | <i>P<sub>Chi2</sub></i> | <i>Comment</i>      |
|--------------------|-----------------|--------------------------|-------------------------|---------------------|
| <i>AZI2</i>        | chr3:p24.1      | rs12054402               | 0.20                    |                     |
| <i>DDX58/RIG-I</i> | chr9:p21.1      | rs4013911                | 0.026                   |                     |
| <i>DHX58/LGP2</i>  | chr17:q21.2     | rs2074159                | 0.11                    |                     |
| <i>FADD</i>        | chr11:q13.3     | rs10898853               | 0.17                    |                     |
| <i>IKBKe</i>       | chr1:q32.1      | rs1539243                | 0.0033                  |                     |
| <i>IRAK4</i>       | chr12:q12       | rs4251520                | 0.44                    |                     |
| <i>IRF1</i>        | chr5:q23.3      | rs12657912               | 0.29                    |                     |
| <i>IRF2</i>        | chr4:q35.1      | rs17075769               | 0.011                   |                     |
| <i>IRF3</i>        | chr19:q13.33    | rs2304207                | 0.29                    |                     |
| <i>IRF4</i>        | chr6:p25.3      | rs6899334                | 0.022                   |                     |
| <i>MyD88</i>       | chr3:p22.3      | rs4988457                | 0.33                    |                     |
| <i>RIPK2</i>       | chr8:q21.3      | rs390993                 | 0.23                    |                     |
| <i>SPP1</i>        | chr4:q22.1      | rs1126616                | 0.29                    |                     |
| <i>TANK</i>        | chr2:q24.2      | rs3754974                | 0.0055                  |                     |
| <i>TBK1</i>        | chr12:q14.2     | rs7298692                | 0.45                    |                     |
| <i>TIRAP</i>       | chr11:q24.2     | rs1786704                | 0.183                   |                     |
| <i>TLR3</i>        | chr4:q35.1      | rs7657186                | 0.33                    |                     |
| <i>TLR4</i>        | chr9:q33.1      | rs5030717                | 0.19                    |                     |
| <i>TLR5</i>        | chr1:q41        | NA                       | NA                      | Failed assay design |
| <i>TLR7</i>        | chrX:p22.2      | rs1638596                | 0.067                   |                     |
| <i>TLR8</i>        | chrX:p22.2      | rs2109134                | 0.43                    |                     |
| <i>TLR9</i>        | chr3:p21.2      | rs352140                 | 0.64                    |                     |
| <i>TRAF3</i>       | chr14q:32.32    | rs10137035               | 0.02                    |                     |
| <i>TRAF6</i>       | chr11:p12       | rs5030482                | 0.0029                  |                     |
| <i>TRAM1</i>       | chr8:q13.3      | rs28491596               | 0.12                    |                     |
| <i>TRIF/TICAM1</i> | chr19:p13.3     | rs7255265                | 0.18                    |                     |
| <i>VISA</i>        | chr20:p13       | rs7262903                | 0.11                    |                     |

**B** Functionally important membrane molecules on PDC

| <i>Gene</i>           | <i>Location</i> | <i>SNP with lowest P</i> | <i>P<sub>Chi2</sub></i> | <i>Comment</i> |
|-----------------------|-----------------|--------------------------|-------------------------|----------------|
| <i>CLEC4C/CLECSF7</i> | chr12:p13.31    | rs6488610                | 0.018                   |                |
| <i>CXCR3</i>          | chrX:q13.1      | rs2280964                | 0.41                    |                |
| <i>CXCR4</i>          | chr2:q21.3      | rs2228014                | 0.077                   |                |
| <i>FCGR2A</i>         | chr1:q23.3      | rs1801274                | 0.18                    |                |
| <i>FCGR2B</i>         | chr1:q23.3      | rs2333845                | 0.11                    |                |
| <i>NRP1</i>           | chr10:p11.22    | rs1331314                | 0.0020                  |                |

**C Type I IFN and other cytokine genes regulated via TLR and RLR pathways**

| <i>Gene</i>   | <i>Location</i> | <i>SNP with lowest P</i> | <i>P<sub>Chi2</sub></i> | <i>Comment</i>       |
|---------------|-----------------|--------------------------|-------------------------|----------------------|
| <i>CXCL11</i> | chr4:q21.1      | rs7436646                | 0.36                    |                      |
| <i>CXCL12</i> | chr10:q11.21    | rs2839695                | 0.080                   |                      |
| <i>CXCL9</i>  | chr4:q21.1      | rs3733236                | 0.060                   |                      |
| <i>IFNA1</i>  | chr9:p21.3      | rs1332190                | 0.67                    |                      |
| <i>IFNA2</i>  | chr9:p21.3      | rs615544                 | 0.18                    |                      |
| <i>IFNA4</i>  | chr9:p21.3      | rs2383183                | 0.025                   |                      |
| <i>IFNA5</i>  | chr9:p21.3      | rs7021906                | 0.14                    |                      |
| <i>IFNA6</i>  | chr9:p21.3      | rs614541                 | 0.23                    |                      |
| <i>IFNA7</i>  | chr9:p21.3      | rs28368137               | 0.34                    |                      |
| <i>IFNA8</i>  | chr9:p21.3      | rs1330322                | 0.067                   |                      |
| <i>IFNA10</i> | chr9:p21.3      | rs12555631               | 0.32                    |                      |
| <i>IFNA13</i> | chr9:p21.3      | rs643070                 | 0.045                   |                      |
| <i>IFNA14</i> | chr9:p21.3      | rs28368137               | 0.34                    |                      |
| <i>IFNA16</i> | chr9:p21.3      | rs10964912               | 0.97                    |                      |
| <i>IFNA17</i> | chr9:p21.3      | rs10964920               | 0.14                    |                      |
| <i>IFNA21</i> | chr9:p21.3      | rs7047299                | 0.042                   |                      |
| <i>IFNB1</i>  | chr9:p21.3      | rs1051922                | 0.29                    |                      |
| <i>IFNE1</i>  | chr9:p21.3      | rs1556461                | 0.083                   |                      |
| <i>IFNK</i>   | chr9:p21.2      | rs4879540                | 0.26                    |                      |
| <i>IFNW1</i>  | chr9:p21.3      | rs10757189               | 0.036                   |                      |
| <i>IL28A</i>  | chr19:q13.2     | NA                       | NA                      | Failed genotyping QC |
| <i>IL28B</i>  | chr19:q13.2     | NA                       | NA                      | Failed genotyping QC |
| <i>IL29</i>   | chr19:q13.2     | rs7247086                | 0.12                    |                      |

**D Genes involved in response to type I and III IFN (mediation and regulation)**

| <i>Gene</i>        | <i>Location</i> | <i>SNP with lowest P</i> | <i>P<sub>Chi2</sub></i> | <i>Comment</i>      |
|--------------------|-----------------|--------------------------|-------------------------|---------------------|
| <i>IFNAR1</i>      | chr21:q22.11    | rs17875880               | 0.18                    |                     |
| <i>IFNAR2</i>      | chr21:q22.11    | rs16990416               | 0.12                    |                     |
| <i>IL10RB</i>      | chr21:q22.11    | NA                       | NA                      | Failed assay design |
| <i>IL28RA</i>      | chr1:p36.11     | rs3932667                | 0.46                    |                     |
| <i>IRF9/ISGF3G</i> | chr14:q11.2     | rs2236350                | 0.16                    |                     |
| <i>JAK1</i>        | chr1:p31.3      | rs4916004                | 0.039                   |                     |
| <i>PIAS1</i>       | chr15:q23       | rs8025474                | 0.042                   |                     |
| <i>PIAS2</i>       | chr18:q21.1     | rs3786258                | 0.38                    |                     |
| <i>PIAS3</i>       | chr1:q21.1      | rs17352344               | 0.22                    |                     |
| <i>PIAS4</i>       | chr19:p13.3     | rs2289863                | 0.00069                 |                     |
| <i>SOCS1</i>       | chr16:p13.13    | rs193779                 | 0.24                    |                     |
| <i>SOCS3</i>       | chr17:q25.3     | rs8064821                | 0.88                    |                     |
| <i>STAT1</i>       | chr2:q32.2      | rs10199181               | 0.0016                  |                     |
| <i>STAT2</i>       | chr12:q13.3     | rs2066807                | 0.75                    |                     |
| <i>STAT3</i>       | chr17:q21.2     | rs17880368               | 0.019                   |                     |
| <i>STAT5A</i>      | chr17:q21.2     | rs8068688                | 0.74                    |                     |
| <i>STAT5B</i>      | chr17:q21.2     | rs6503691                | 0.013                   |                     |

**E Genes regulated by type I IFN**

| <i>Gene</i>      | <i>Location</i>    | <i>SNP with lowest P</i> | <i>P<sub>Chi2</sub></i> | <i>Comment</i> |
|------------------|--------------------|--------------------------|-------------------------|----------------|
| <i>CXCL10</i>    | chr4:q21.1         | rs3921                   | 0.35                    |                |
| <i>TNFSF11</i>   | chr13:q14          | rs9594782                | 0.076                   |                |
| <i>TNFSF13B</i>  | chr13:q32-q34      | rs9520835                | 0.032                   |                |
| <i>TNFSF13</i>   | chr17:p13.1        | rs12942687               | 0.52                    |                |
| <i>TNFRSF13B</i> | chr17:p11.2        | rs4985700                | 0.094                   |                |
| <i>TNFRSF17</i>  | chr16:p13.1        | rs11570158               | 0.27                    |                |
| <i>TNFRSF13C</i> | chr22:q13.1-q13.31 | rs7290134                | 0.43                    |                |

**F Other genes**

| <i>Gene</i>   | <i>Location</i> | <i>SNP with lowest P</i> | <i>P<sub>Chi2</sub></i> | <i>Comment</i> |
|---------------|-----------------|--------------------------|-------------------------|----------------|
| <i>DQX1</i>   | chr2:p13.1      | rs6709863                | 0.035                   |                |
| <i>RALBP1</i> | chr18:p11.22    | rs17508182               | 0.076                   |                |

**G Genes that had published association to SLE**

| <i>Gene</i>     | <i>Location</i> | <i>SNP with lowest P</i> | <i>P<sub>Chi2</sub></i> | <i>Comment</i> |
|-----------------|-----------------|--------------------------|-------------------------|----------------|
| <i>ACE</i>      | chr17:q23.3     | rs4267385                | 0.15                    |                |
| <i>C6orf125</i> | chr6:p21.31     | rs594223                 | 0.050                   |                |
| <i>CCL2</i>     | chr17:q12       | rs3760396                | 0.33                    |                |
| <i>CRP</i>      | chr1:q23.2      | rs1800947                | 0.33                    |                |
| <i>CTLA4</i>    | chr2:q33.2      | rs231779                 | 0.21                    |                |
| <i>DNASE1</i>   | chr16:p13.3     | rs1053874                | 0.90                    |                |
| <i>FCRL3</i>    | chr1:q23.1      | rs7528684                | 0.19                    |                |
| <i>IL1A</i>     | chr2:q13        | rs1800587                | 0.89                    |                |
| <i>IL1RN</i>    | chr2:q13        | rs380092                 | 0.18                    |                |
| <i>IL6</i>      | chr7:p15.3      | rs1474348                | 0.036                   |                |
| <i>IL8</i>      | chr4:q13.3      | rs4694178                | 0.0048                  |                |
| <i>ITPR3</i>    | chr6:p21.31     | rs2296329                | 0.039                   |                |
| <i>MBL2</i>     | chr10:q21.1     | rs10824793               | 0.26                    |                |
| <i>PADI4</i>    | chr1:p36.13     | rs2240340                | 0.96                    |                |

<sup>1</sup> 482 Swedish SLE cases and 536 controls.

**Table S4** The most promising SNPs in the eight genes identified in the discovery phase<sup>1</sup> (SNPs with  $P < 0.05$ ). The rs-number of the SNP with the lowest p-value in each gene is indicated in bold. Independence of association signals within the same gene was investigated with a conditional analysis accounting for the most strongly associated SNP in each gene.

| <i>Gene</i>   | <i>Chr</i> | <i>SNP</i>        | <i>Position</i> | $P_{logistic}$ | $P_{conditional}$ | $r^2$ | <i>Confirmatory phase</i> |
|---------------|------------|-------------------|-----------------|----------------|-------------------|-------|---------------------------|
| <i>IKBKE</i>  | 1          | <b>rs1539243</b>  | 203036182       | 0.0036         | NA                | 1     | Genotyped                 |
| <i>IKBKE</i>  | 1          | rs17433930        | 203041134       | 0.011          | 0.28              | 0.33  | Genotyped                 |
| <i>TANK</i>   | 2          | rs3820998         | 161820633       | 0.0089         | NA                | 0.99  |                           |
| <i>TANK</i>   | 2          | <b>rs3754974</b>  | 161838462       | 0.0062         | NA                | 1     | Genotyped                 |
| <i>TANK</i>   | 2          | rs13397244        | 161839598       | 0.0067         | NA                | 0.99  | Genotyped                 |
| <i>TANK</i>   | 2          | rs1267076         | 161848164       | 0.028          | 0.056             | 0.01  |                           |
| <i>TANK</i>   | 2          | rs12476789        | 161852196       | 0.0089         | NA                | 0.99  | Genotyped                 |
| <i>TANK</i>   | 2          | rs1267078         | 161857178       | 0.036          | 0.063             | 0.01  |                           |
| <i>TANK</i>   | 2          | rs1267080         | 161864079       | 0.039          | 0.069             | 0.01  |                           |
| <i>TANK</i>   | 2          | rs16845704        | 161875201       | 0.038          | 1.00              | 0.94  |                           |
| <i>TANK</i>   | 2          | rs7600342         | 161880718       | 0.015          | NA                | 0.99  | Genotyped                 |
| <i>TANK</i>   | 2          | rs3754972         | 161882525       | 0.0089         | NA                | 0.99  | Genotyped                 |
| <i>TANK</i>   | 2          | rs3769975         | 161883914       | 0.024          | 0.81              | 0.87  |                           |
| <i>TANK</i>   | 2          | rs1267075         | 161885324       | 0.029          | 0.052             | 0.01  | Genotyped                 |
| <i>TANK</i>   | 2          | rs3769973         | 161889981       | 0.0081         | NA                | 0.99  |                           |
| <i>TANK</i>   | 2          | rs3769972         | 161893004       | 0.011          | NA                | 1     | Genotyped                 |
| <i>TANK</i>   | 2          | rs10178063        | 161899325       | 0.0089         | NA                | 0.99  | Genotyped                 |
| <i>TANK</i>   | 2          | rs12471074        | 161914481       | 0.024          | 0.64              | 0.86  |                           |
| <i>TANK</i>   | 2          | rs3754971         | 161917272       | 0.024          | 0.81              | 0.87  |                           |
| <i>STAT1</i>  | 2          | rs1547550         | 191671231       | 0.015          | 0.41              | 0.29  |                           |
| <i>STAT1</i>  | 2          | rs2280232         | 191676272       | 0.044          | 0.029             | 0.01  |                           |
| <i>STAT1</i>  | 2          | rs7562024         | 191681027       | 0.048          | 0.97              | 0.37  |                           |
| <i>STAT1</i>  | 2          | rs16833155        | 191686883       | 0.0097         | 0.049             | 0.05  | Failed genotyping         |
| <i>STAT1</i>  | 2          | rs10173099        | 191692838       | 0.0071         | 0.90              | 0.71  |                           |
| <i>STAT1</i>  | 2          | rs2030171         | 191694669       | 0.0036         | 0.51              | 0.71  | Genotyped                 |
| <i>STAT1</i>  | 2          | <b>rs10199181</b> | 191699059       | 0.0013         | NA                | 1     | Failed genotyping         |
| <i>STAT1</i>  | 2          | rs16833172        | 191701575       | 0.0067         | 0.022             | 0.02  | Genotyped                 |
| <i>STAT1</i>  | 2          | rs17817900        | 191705373       | 0.011          | 0.037             | 0.02  | Failed genotyping         |
| <i>STAT1</i>  | 2          | rs1467199         | 191706008       | 0.028          | 0.87              | 0.43  |                           |
| <i>IL8</i>    | 4          | <b>rs4694178</b>  | 74977723        |                | NA                | 1     | Genotyped                 |
| <i>NRP1</i>   | 10         | rs2474726         | 33523567        | 0.039          | 0.44              | 0.20  |                           |
| <i>NRP1</i>   | 10         | rs734187          | 33524702        | 0.046          | 0.47              | 0.20  | Genotyped                 |
| <i>NRP1</i>   | 10         | rs2269103         | 33539226        | 0.012          | 0.31              | 0.90  | Genotyped                 |
| <i>NRP1</i>   | 10         | rs3904032         | 33560274        | 0.015          | 0.36              | 0.91  |                           |
| <i>NRP1</i>   | 10         | <b>rs1331314</b>  | 33564687        | 0.0023         | NA                | 1     | Genotyped                 |
| <i>NRP1</i>   | 10         | rs11009314        | 33570967        | 0.0074         | 0.52              | 0.95  |                           |
| <i>NRP1</i>   | 10         | rs2073320         | 33593263        | 0.037          | 0.020             | 0.00  | Genotyped                 |
| <i>TRAF6</i>  | 11         | <b>rs5030482</b>  | 36466602        | 0.0028         | NA                | 1     | Genotyped                 |
| <i>TRAF6</i>  | 11         | rs5030472         | 36470362        | 0.036          | 0.67              | 0.61  | Genotyped                 |
| <i>TRAF6</i>  | 11         | rs2303439         | 36470866        | 0.018          | 0.42              | 0.82  | Failed genotyping         |
| <i>STAT5B</i> | 17         | <b>rs6503691</b>  | 37647616        | 0.0100         | NA                | 1     | Genotyped                 |
| <i>PIAS4</i>  | 19         | <b>rs2289863</b>  | 3979783         | 0.00099        | NA                | 1     | Genotyped                 |

$P_{logistic}$  is the p-value for a logistic regression analysis under an additive model.

$P_{conditional}$  is the p-value in a additive logistic regression analysis conditioning on the best SNP in the gene.

$r^2$  is the pair-wise LD with the SNP with the lowest p-value in the gene.

<sup>1</sup> 482 Swedish SLE cases and 536 controls.



**Table S5** Results of the combined analysis for the Swedish discovery and confirmation SLE cohorts<sup>1</sup>

| <i>Gene</i>   | <i>CHR</i> | <i>SNP</i> | <i>bp</i> | <i>Minor/major alleles</i> | <i>MAF cases</i> | <i>MAF controls</i> | <i>P<sub>SNPtest</sub></i> | <i>Risk allele</i> | <i>OR (95% CI)</i> | <i>P<sub>logistic</sub></i> | <i>P<sub>conditional</sub></i> |
|---------------|------------|------------|-----------|----------------------------|------------------|---------------------|----------------------------|--------------------|--------------------|-----------------------------|--------------------------------|
| <i>IKBKE</i>  | 1          | rs1539243  | 204714410 | T/C                        | 0.16             | 0.18                | <b>0.031</b>               | C                  | 1.19 (1.02-1.39)   | 0.029                       | 0.51                           |
| <i>IKBKE</i>  | 1          | rs17433930 | 204719362 | G/A                        | 0.07             | 0.09                | <b>0.013</b>               | A                  | 1.33 (1.06-1.67)   | 0.011                       | NA                             |
| <i>TANK</i>   | 2          | rs3754974  | 161721201 | G/A                        | 0.05             | 0.04                | <b>0.0087</b>              | G                  | 1.44 (1.09-1.89)   | 0.0080                      | NA                             |
| <i>TANK</i>   | 2          | rs13397244 | 161722337 | G/A                        | 0.05             | 0.04                | <b>0.010</b>               | G                  | 1.42 (1.08-1.86)   | 0.0092                      | NA                             |
| <i>TANK</i>   | 2          | rs12476789 | 161734935 | G/A                        | 0.05             | 0.04                | <b>0.019</b>               | G                  | 1.38 (1.05-1.81)   | 0.017                       | NA                             |
| <i>TANK</i>   | 2          | rs7600342  | 161763457 | G/A                        | 0.05             | 0.04                | <b>0.049</b>               | G                  | 1.39 (1.06-1.82)   | 0.016                       | NA                             |
| <i>TANK</i>   | 2          | rs3754972  | 161765264 | A/T                        | 0.05             | 0.04                | <b>0.010</b>               | A                  | 1.42 (1.08-1.86)   | 0.0094                      | NA                             |
| <i>TANK</i>   | 2          | rs1267075  | 161768063 | G/A                        | 0.19             | 0.18                | 0.75                       | G                  | 1.02 (0.88-1.19)   | 0.77                        | 0.61                           |
| <i>TANK</i>   | 2          | rs3769972  | 161775743 | G/A                        | 0.05             | 0.04                | <b>0.018</b>               | G                  | 1.38 (1.05-1.81)   | 0.017                       | NA                             |
| <i>TANK</i>   | 2          | rs10178063 | 161782064 | G/A                        | 0.05             | 0.04                | <b>0.0078</b>              | G                  | 1.44 (1.10-1.89)   | 0.0072                      | NA                             |
| <i>STAT1</i>  | 2          | rs2030171  | 191577408 | A/G                        | 0.35             | 0.29                | <b>1.2E-05</b>             | A                  | 1.31 (1.16-1.49)   | 1.0E-05                     | NA                             |
| <i>STAT1</i>  | 2          | rs16833172 | 191584314 | A/G                        | 0.04             | 0.03                | <b>0.015</b>               | A                  | 1.51 (1.09-2.09)   | 0.012                       | 0.16                           |
| <i>IL8</i>    | 4          | rs4694178  | 74831552  | C/A                        | 0.52             | 0.46                | <b>5.2E-05</b>             | C                  | 1.26 (1.12-1.42)   | 6.1E-05                     | -                              |
| <i>NRP1</i>   | 10         | rs734187   | 33524702  | A/G                        | 0.24             | 0.24                | 0.67                       | A                  | 1.03 (0.90-1.18)   | 0.65                        | -                              |
| <i>NRP1</i>   | 10         | rs2269103  | 33539226  | T/G                        | 0.11             | 0.11                | 0.31                       | T                  | 1.10 (0.92-1.33)   | 0.34                        | -                              |
| <i>NRP1</i>   | 10         | rs1331314  | 33564687  | G/C                        | 0.11             | 0.10                | 0.32                       | G                  | 1.11 (0.92-1.34)   | 0.30                        | -                              |
| <i>NRP1</i>   | 10         | rs2073320  | 33593263  | A/G                        | 0.38             | 0.37                | 0.42                       | A                  | 1.05 (0.93-1.18)   | 0.43                        | -                              |
| <i>TRAF6</i>  | 11         | rs5030482  | 36466602  | C/T                        | 0.12             | 0.14                | <b>0.0094</b>              | T                  | 1.25 (1.05-1.49)   | 0.012                       | NA                             |
| <i>TRAF6</i>  | 11         | rs5030472  | 36470362  | T/C                        | 0.09             | 0.12                | <b>0.013</b>               | C                  | 1.28 (1.05-1.55)   | 0.012                       | 0.50                           |
| <i>STAT5B</i> | 17         | rs6503691  | 37647616  | T/C                        | 0.09             | 0.10                | 0.44                       | C                  | 1.08 (0.88-1.32)   | 0.38                        | -                              |
| <i>PIAS4</i>  | 19         | rs2289863  | 3979783   | C/T                        | 0.27             | 0.29                | 0.19                       | T                  | 1.09 (0.96-1.25)   | 0.18                        | -                              |

<sup>1</sup>826 Swedish cases and 1 835 controls genotyped in the discovery and replication phases including controls genotyped on the 1M chip

Genotypes for rs17433930, rs3754974, rs13397244, rs12476789, rs7600342, rs3754972, rs10178063, rs2030171, rs16833172, rs4694178, rs734187, rs1331314 and rs5030482 were imputed in the Swedish control genotyped on the 1M chip

MAF= Minor Allele Frequency, NA= Not Available, CI= Confidence Interval

P<sub>conditional</sub> on the SNP with lowest P-value in each gene: IKBKE-rs17433930, TANK-rs10178063, STAT1-rs2030171 and TRAF6-rs5030482.

**Table S6** Complete results of the meta-analysis of the Swedish and US cohorts

| Gene          | SNP        | Alleles | Combined Swedish dataset <sup>1</sup> |           |              |                |                  | US dataset <sup>2</sup> |           |              |                |                          | Meta-analysis <sup>5</sup> |                |                          |                          |                            |
|---------------|------------|---------|---------------------------------------|-----------|--------------|----------------|------------------|-------------------------|-----------|--------------|----------------|--------------------------|----------------------------|----------------|--------------------------|--------------------------|----------------------------|
|               |            |         | Risk allele                           | MAF cases | MAF controls | P <sup>3</sup> | OR (95% CI)      | Risk allele             | MAF cases | MAF controls | P <sup>3</sup> | OR (95% CI) <sup>4</sup> | Risk allele                | P              | Corrected P <sup>6</sup> | OR (95% CI) <sup>4</sup> | Heterogeneity <sup>7</sup> |
| <i>IKBKE</i>  | rs1539243  | T/C     | C                                     | 0.16      | 0.18         | <b>0.031</b>   | 1.19 (1.02-1.39) | C                       | 0.14      | 0.17         | <b>0.0028</b>  | 1.20 (1.07-1.35)         | C                          | <b>2.6E-04</b> | <b>0.0054</b>            | 1.19 (1.09-1.31)         | 0.95                       |
| <i>IKBKE</i>  | rs17433930 | G/A     | A                                     | 0.07      | 0.09         | <b>0.013</b>   | 1.33 (1.06-1.67) | A                       | 0.06      | 0.07         | <b>0.0021</b>  | 1.33 (1.11-1.58)         | A                          | <b>1.0E-04</b> | <b>0.0022</b>            | 1.33 (1.16-1.53)         | 0.99                       |
| <i>TANK</i>   | rs3754974  | G/A     | G                                     | 0.05      | 0.04         | <b>0.0087</b>  | 1.44 (1.09-1.89) | NA                      | 0.04      | 0.04         | 0.98           | 0.99 (0.80-1.22)         | NA                         | 0.22           | 1.0                      | 1.13 (0.96-1.34)         | 0.033                      |
| <i>TANK</i>   | rs13397244 | G/A     | G                                     | 0.05      | 0.04         | <b>0.010</b>   | 1.42 (1.08-1.86) | NA                      | 0.04      | 0.04         | 0.98           | 0.99 (0.80-1.22)         | NA                         | 0.23           | 1.0                      | 1.13 (0.96-1.33)         | 0.038                      |
| <i>TANK</i>   | rs12476789 | G/A     | G                                     | 0.05      | 0.04         | <b>0.019</b>   | 1.38 (1.05-1.81) | NA                      | 0.04      | 0.04         | 0.96           | 0.99 (0.80-1.23)         | NA                         | 0.29           | 1.0                      | 1.12 (0.95-1.32)         | 0.063                      |
| <i>TANK</i>   | rs7600342  | G/A     | G                                     | 0.05      | 0.04         | <b>0.049</b>   | 1.39 (1.06-1.82) | NA                      | 0.04      | 0.04         | 0.87           | 0.95 (0.76-1.19)         | NA                         | 0.43           | 1.0                      | 1.09 (0.92-1.29)         | 0.037                      |
| <i>TANK</i>   | rs3754972  | A/T     | A                                     | 0.05      | 0.04         | <b>0.010</b>   | 1.42 (1.08-1.86) | NA                      | 0.04      | 0.04         | 0.95           | 0.96 (0.77-1.20)         | NA                         | 0.24           | 1.0                      | 1.12 (0.94-1.32)         | 0.028                      |
| <i>TANK</i>   | rs1267075  | G/A     | G                                     | 0.19      | 0.18         | 0.75           | 1.02 (0.88-1.19) | NA                      | 0.17      | 0.17         | 0.87           | 0.99 (0.89-1.11)         | NA                         | 0.99           | 1.0                      | 1.00 (0.92-1.10)         | 0.71                       |
| <i>TANK</i>   | rs3769972  | G/A     | G                                     | 0.05      | 0.04         | <b>0.018</b>   | 1.38 (1.05-1.81) | NA                      | 0.04      | 0.04         | 0.95           | 0.96 (0.77-1.20)         | NA                         | 0.29           | 1.0                      | 1.10 (0.93-1.30)         | 0.043                      |
| <i>TANK</i>   | rs10178063 | G/A     | G                                     | 0.05      | 0.04         | <b>0.0078</b>  | 1.44 (1.10-1.89) | NA                      | 0.04      | 0.04         | 0.93           | 0.95 (0.77-1.19)         | NA                         | 0.23           | 1.0                      | 1.11 (0.94-1.32)         | 0.019                      |
| <i>STAT1</i>  | rs2030171  | A/G     | A                                     | 0.35      | 0.29         | <b>1.2E-05</b> | 1.31 (1.16-1.49) | A                       | 0.37      | 0.34         | <b>0.018</b>   | 1.11 (1.02-1.21)         | A                          | <b>3.3E-05</b> | <b>6.9E-04</b>           | 1.17 (1.09-1.26)         | 0.029                      |
| <i>STAT1</i>  | rs16833172 | A/G     | A                                     | 0.04      | 0.03         | <b>0.015</b>   | 1.51 (1.09-2.09) | A                       | 0.03      | 0.02         | 0.16           | 1.23 (0.95-1.59)         | A                          | <b>0.016</b>   | 0.34                     | 1.33 (1.09-1.63)         | 0.34                       |
| <i>IL8</i>    | rs4694178  | C/A     | C                                     | 0.52      | 0.46         | <b>5.2E-05</b> | 1.26 (1.12-1.42) | C                       | 0.43      | 0.41         | 0.064          | 1.13 (1.04-1.23)         | C                          | <b>4.0E-04</b> | <b>0.0084</b>            | 1.17 (1.10-1.26)         | 0.12                       |
| <i>NRP1</i>   | rs734187   | A/G     | A                                     | 0.24      | 0.24         | 0.67           | 1.03 (0.90-1.18) | NA                      | 0.25      | 0.25         | 0.66           | 1.01 (0.92-1.12)         | A                          | 0.56           | 1.0                      | 1.02 (0.94-1.10)         | 0.80                       |
| <i>NRP1</i>   | rs2269103  | T/G     | T                                     | 0.11      | 0.11         | 0.31           | 1.10 (0.92-1.33) | T                       | 0.11      | 0.10         | 0.065          | 1.11 (0.97-1.28)         | T                          | <b>0.036</b>   | 0.75                     | 1.11 (1.00-1.24)         | 0.96                       |
| <i>NRP1</i>   | rs1331314  | G/C     | G                                     | 0.11      | 0.10         | 0.32           | 1.11 (0.92-1.34) | G                       | 0.12      | 0.11         | 0.11           | 1.11 (0.97-1.26)         | G                          | 0.061          | 1.0                      | 1.11 (1.00-1.23)         | 0.99                       |
| <i>NRP1</i>   | rs2073320  | A/G     | A                                     | 0.38      | 0.37         | 0.42           | 1.05 (0.93-1.18) | NA                      | 0.38      | 0.39         | 0.61           | 0.98 (0.90-1.06)         | NA                         | 0.94           | 1.0                      | 1.00 (0.94-1.07)         | 0.35                       |
| <i>TRAF6</i>  | rs5030482  | C/T     | T                                     | 0.12      | 0.14         | <b>0.0094</b>  | 1.25 (1.05-1.49) | T                       | 0.13      | 0.14         | 0.12           | 1.10 (0.97-1.24)         | T                          | <b>0.0097</b>  | 0.20                     | 1.14 (1.03-1.26)         | 0.22                       |
| <i>TRAF6</i>  | rs5030472  | T/C     | C                                     | 0.09      | 0.12         | <b>0.013</b>   | 1.28 (1.05-1.55) | C                       | 0.11      | 0.11         | 0.19           | 1.09 (0.96-1.25)         | C                          | <b>0.020</b>   | 0.42                     | 1.15 (1.03-1.28)         | 0.20                       |
| <i>STAT5B</i> | rs6503691  | T/C     | C                                     | 0.09      | 0.10         | 0.44           | 1.08 (0.88-1.32) | NA                      | 0.11      | 0.11         | 0.78           | 0.98 (0.86-1.12)         | NA                         | 0.91           | 1.0                      | 1.01 (0.90-1.13)         | 0.44                       |
| <i>PIAS4</i>  | rs2289863  | C/T     | T                                     | 0.27      | 0.29         | 0.19           | 1.09 (0.96-1.25) | NA                      | 0.26      | 0.26         | 0.72           | 0.98 (0.89-1.08)         | NA                         | 0.76           | 1.0                      | 1.02 (0.95-1.10)         | 0.19                       |

<sup>1</sup>826 Swedish cases and 1 835 controls genotyped in the discovery and replication phases including controls genotyped on the 1M chip, P-values calculated using SNPtest

<sup>2</sup>1 310 US SLE cases and 7 859 controls genotyped in a GWAS. Genotypes for rs17433930, rs3754974, rs13397244, rs12476789, rs7600342, rs3754972, rs3769972, rs10178063, rs2030171, rs16833172, rs4694178, rs734187, rs2269103, rs1331314 and rs5030482 were imputed in this dataset as described in Gateva *et al.* P-values calculated using SNPtest

<sup>3</sup>P-value calculated using SNPtest

<sup>4</sup>Odds ratios are calculated relative to the risk allele defined in the analysis of the combined Swedish cohort

<sup>5</sup>Meta-analysis including 2 136 SLE cases and 9 694 controls

<sup>6</sup>P-value corrected for the 21 tested SNPs

<sup>7</sup>P-value test for heterogeneity of odds ratios

MAF= Minor Allele Frequency, NA= Not Available, CI= Confidence Interval
